# Supplementary material
Source: PubMed Central journal article supplement (PMC3678045)
Supplement: tjp0591-2593-SD1.pdf [file tjp0591-2593-SD1.pdf]

## Supplementary Material

### 1. Original cell-attached patch-clamp recordings

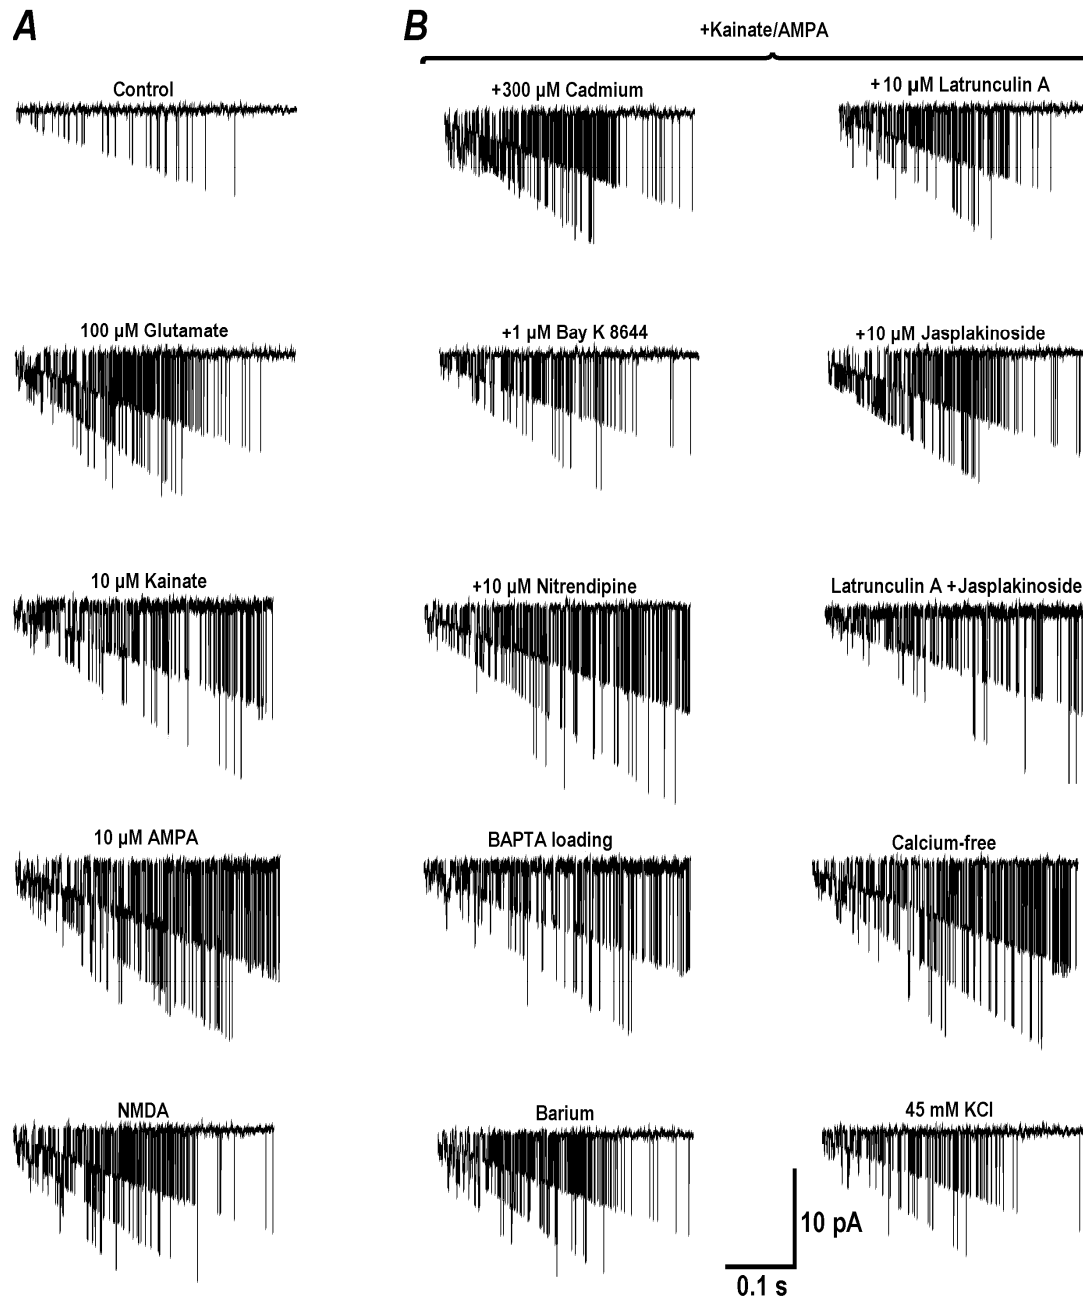

**Fig. S1. GluR-mediated potentiation of KATP channels.**

**A** - Representative traces show KATP channel activities in the control and 2 min after applications of 100  $\mu\text{M}$  glutamate, 10  $\mu\text{M}$  kainate or AMPA and 100  $\mu\text{M}$  NMDA. **B** - Specimens of KATP channel activity obtained 2 min after testing applications of 10  $\mu\text{M}$  AMPA or kainate in the presence of 1  $\mu\text{M}$  Bay K 8644 and 10  $\mu\text{M}$  Nitrendipine to modulate

L-type calcium channels, 1 mM cadmium (to block calcium entry into the cell); after replacement of external calcium with barium, and in calcium-free solutions. Neurons were incubated with agents for 3 to 30 min and they were left in the bath during AMPA/kainate applications. GluR effects were also tested in neurons loaded with the calcium chelator BAPTA (incubation with 10  $\mu$ M AM-ester for 30 min; washout, 30 min); after modification of actin turnover with 10  $\mu$ M Latrunculin A and 10  $\mu$ M Jasplakinolide (applied also in combination, Section 4).

## 2. Osmotic effects

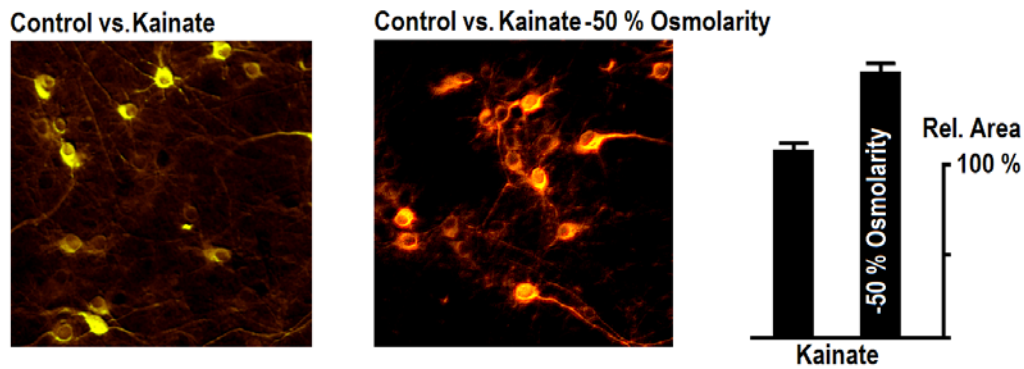

**Fig. S2. Kainate and osmolarity effects.**

Two overlays of images (green, before; red, 3 min after 10  $\mu$ M kainate) were obtained in normal and hypotonic ACSF. Neurons for experiments were transduced with GFP-synapsin (Hartelt et al. 2008). [Histogram on the right shows mean increases in the somatic area after kainate in the control and hypotonic solution \( \$n = 24, p = 0.056\$ \).](#)

### 3. ROS imaging

ROS levels were imaged with ro-GFP1 (Hanson et al. 2004). Sensor distribution within cytoplasm was non-uniform (inset in Fig. S3) and possibly reflected locations of mitochondria, a major source of ROS. Oxidizing agent  $H_2O_2$  increased fluorescence ratio (380/470 nm excitation) and reducing agent dithiotreitol (DTT) reversed the effect with undershoot (Fig. S3). Application of 10  $\mu$ M kainate for 3 min did not change signals ( $n = 6$ ).

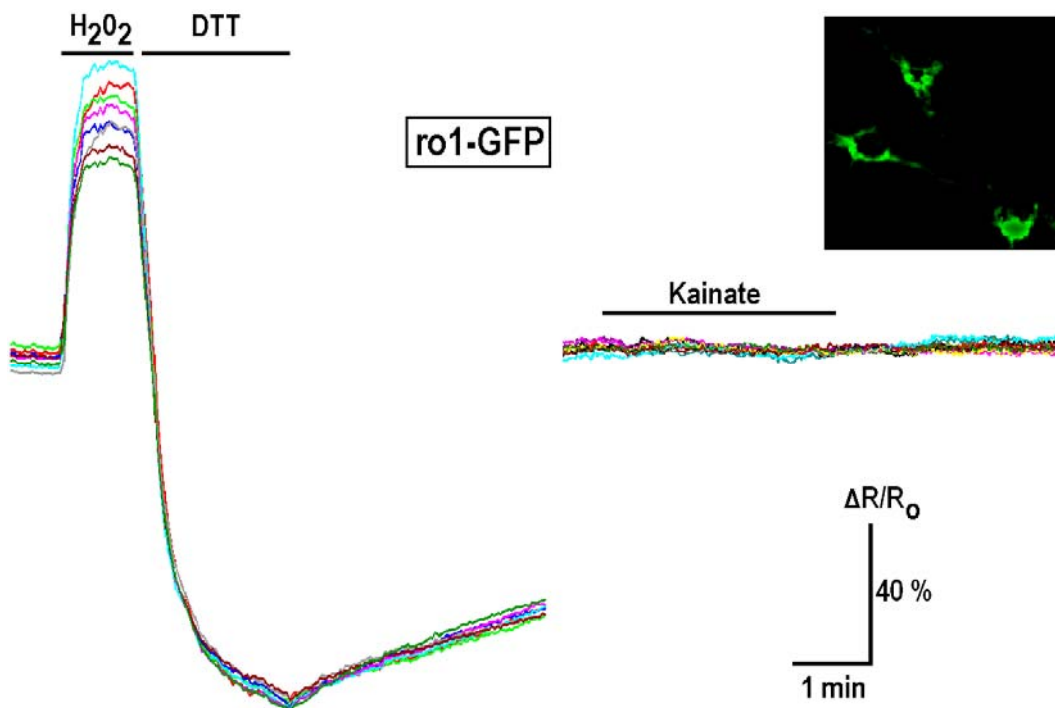

**Fig. S3. ROS changes and GluR effects.**

Differently colored traces present responses of neurons and the inset shows neurons transduced with ROS sensor ro-GFP1. Traces present changes in the ratio of fluorescence excited at 380 and 470 nm (emission, 515 nm) in response to 0.1 mM  $H_2O_2$  and 1 mM dithiotreitol indicating dynamic range of ROS sensing. 10  $\mu$ M kainate did not change FRET/CFP ratio as shown by traces in the right panel.

#### **4. Actin turnover is not involved in GluR effects on KATP channels**

Contribution of cytoskeleton dynamics to ATP consumption was assessed using jasplakinolide to slow down actin filament turnover by inhibiting actin disassembly and latrunculin A to prevent actin assembly by sequestering actin monomers. Both drugs (alone and in combination) did not modify increases in KATP channel opening after AMPA/kainate (Fig. S4; original recordings, Fig. S1).

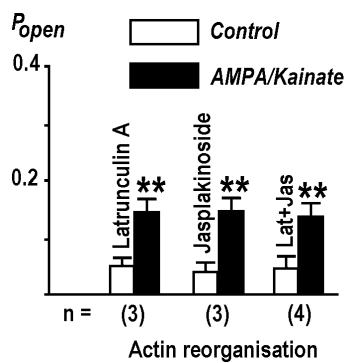

**Fig. S4. Actin-reorganization is not involved in AMPA/kainate effects.**

Experiments were performed after modification of actin turnover with Latrunculin A (10  $\mu$ M) and Jasplakinolide (10  $\mu$ M, both applied for 30 min). The experimental protocols reproduced that used by Bernstein and Bamberg (2003).

Bernstein, B.W, and Bamberg, J.R. (2003). Actin-ATP hydrolysis is a major energy drain for neurons. *J. Neurosci.* 23, 1-6.
